# Supplementary material for: Significant effects of minor chemical composition changes on the structure and property of (Pb1−ySry)(Mg1/3Nb2/3)0.07ZrxTi0.93−xO3:zLa
Source: Royal Society of Chemistry journal article supplement (doi:10.1039/d4dt02007c), 2024-01-01
Supplement: d4dt02007c1.pdf [file d4dt02007c1.pdf]

## Significant effects of minor chemical composition changing on structure and property of $(\text{Pb}_{1-y}\text{Sr}_y)(\text{Mg}_{1/3}\text{Nb}_{2/3})_{0.07}\text{Zr}_x\text{Ti}_{0.93-x}\text{O}_3\text{:zLa}$

Jian Guo<sup>1</sup>, Ming-Yuan Yan<sup>1</sup>, Hao-Ran Yu<sup>1</sup>, Ji Zhang<sup>2,\*</sup>, Guoliang Yuan<sup>2</sup>, Shan-Tao Zhang<sup>1,3,\*</sup>

<sup>1</sup> National Laboratory of Solid State Microstructures, College of Engineering and Applied Sciences, Nanjing University, Nanjing 210093, China

<sup>2</sup> School of Materials Science and Engineering, Nanjing University of Science & Technology, Nanjing 210094, China

<sup>3</sup> Nanjing University (Suzhou) High-tech Institute, Suzhou Industrial Park 215123, China

\*Corresponding authors: jizhang@njust.edu.cn, stzhang@nju.edu.cn

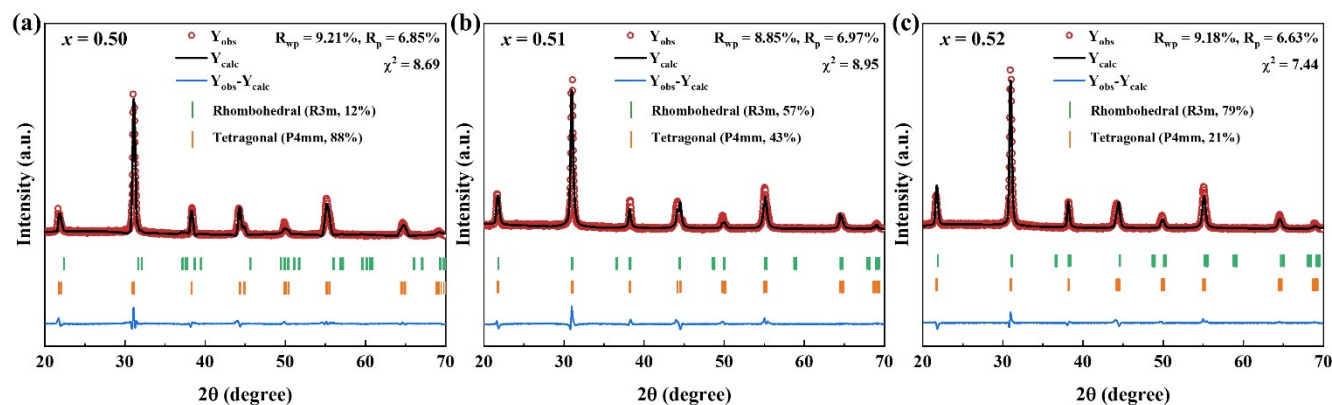

Figure S1 (a)-(c) The results of Rietveld structural refinement of the ceramics with  $x = 0.50-0.52$ ,  $y = 0.06$  and  $z = 0.025$ .

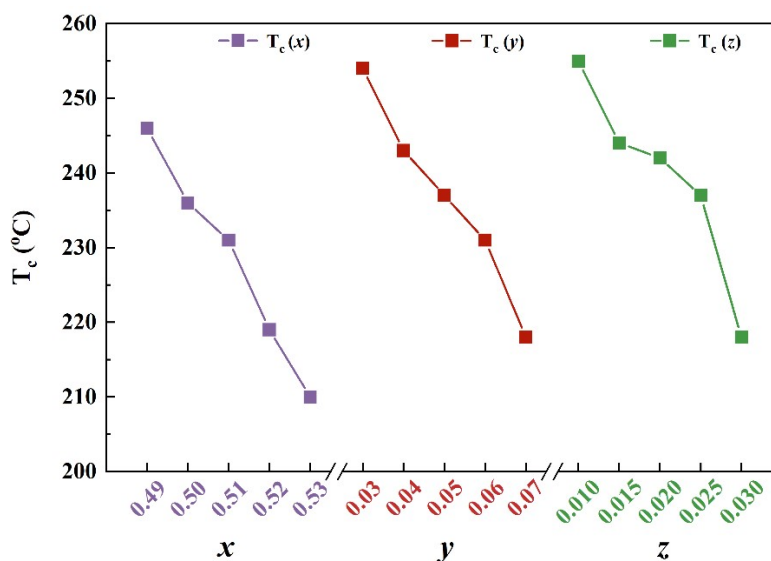

Figure S2 The summary plot of  $T_c$  versus  $x$ - $y$ - $z$ .

**Table S1** Comparison of piezoelectric coefficient  $d_{33}$  and Curie temperature  $T_c$  of Pb-based piezoceramics

| <b>Composition</b> | <b><math>d_{33}</math> (pC/N)</b> | <b><math>T_c</math> (°C)</b> | <b>Ref.</b> |
|--------------------|-----------------------------------|------------------------------|-------------|
| PZT-4              | 289                               | 328                          | [1]         |
| PZT-5              | 365                               | 358                          | [1]         |
| PZT-5A             | 515                               | 310                          | [1]         |
| PZT-5H             | 595                               | 193                          | [2]         |
| PZT-8              | 218                               | 300                          | [3]         |
| PNN-PT             | 531                               | 55                           | [4]         |
| PNN-PZT            | 1015                              | 100                          | [5]         |
| PMN-PT             | 580                               | 158                          | [6]         |
| PMN-PZT            | 760                               | 198                          | [7]         |
| <b>This work</b>   | 645                               | 242                          |             |

**Reference**

- [1] G. H. Haertling, *J. Am. Ceram. Soc.* 1999, **82**, 797-818.
- [2] J. Guo, B. Tong, J. Jian, J. Chen, T. Zhou, X. Shang, J. Cheng, *J. Eur. Ceram. Soc.* 2020, **40**, 3348-3353.
- [3] T. R. Shrout, S. J. Zhang, *J. Electroceram.* 2007, **19**, 111-124.
- [4] H. Yu, J. Guo, J. Wang, J. Zhang, S.-T. Zhang, *Dalton Trans.* 2024, **53**, 11713-11719.
- [5] L. Bian, X. Qi, K. Li, Y. Yu, L. Liu, Y. Chang, W. Cao, S. Dong, *Adv. Funct. Mater.* 2020, **30**, 2001846.
- [6] J. Wang, S. Wang, X. Li, L. Li, Z. Liu, J. Zhang, Y. Wang, *J. Adv. Ceram.* 2023, **12**, 792-802.
- [7] L. Wang, R. Liang, C. Mao, M. Gao, G. Du, F. Cao, G. Wang, X. Dong, *J. Am. Ceram. Soc.* 2012, **95**, 445-448.
